# Supplementary material for: Depolymerase improves gentamicin efficacy during Klebsiella pneumoniae induced murine infection
Source: PubMed Central journal article supplement (PMC4150946; doi:10.1186/1471-2334-14-456), 2014-08-23
Supplement: 12879_2014_3750_MOESM1_ESM.pdf [file 12879_2014_3750_MOESM1_ESM.pdf]

## Additional file 1

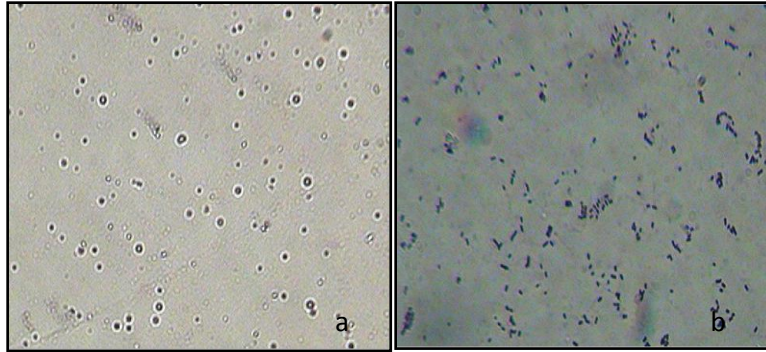

Microscopic appearance of *K. pneumoniae* B5055: encapsulated untreated bacteria (a) depolymerase treated bacteria (b). The bacterial cells were taken on a clean glass slide. A drop of safranin was mixed with bacterial culture and the suspension was spread neatly on the slide. The smear was stained with crystal violet for 1 min, washed gently and observed under a light microscope (40X).
